# Supplementary material for: Interspecies Translation of Disease Networks Increases Robustness and Predictive Accuracy
Source: PubMed Central journal article supplement (PMC3207951; doi:10.1371/journal.pcbi.1002258), 2011-11-03
Supplement: pcbi.1002258.s001.pdf [file pcbi.1002258.s001.pdf]

## **SUPPLEMENTARY MATERIALS**

### **Interspecies translation of disease networks increases robustness and predictive accuracy**

Seyed Yahya Anvar<sup>1,\*</sup>, Allan Tucker<sup>2</sup>, Veronica Vinciotti<sup>2</sup>, Andrea Venema<sup>1</sup>, Gert-Jan B van Ommen<sup>1</sup>, Silvere M van der Maarel<sup>1</sup>, Vered Raz<sup>1</sup>, Peter AC 't Hoen<sup>1</sup>

<sup>1</sup>Center for Human and Clinical Genetics, Leiden University Medical Center, P.O. Box 9600, 2300 RC Leiden, the Netherlands. <sup>2</sup>Center for Intelligent Data Analysis, School of Information Systems, Computing and Mathematics, Brunel University, Uxbridge, Middlesex, UB8 3PH, United Kingdom.

*Correspondence:* [s.y.anvar@lumc.nl](mailto:s.y.anvar@lumc.nl)

**Table S1** – Terminological definitions.

| <b>Term</b>          | <b>Definition</b>                                                                                                                                                                                                                                                                                                                                                                                                                                                                                                                                               |
|----------------------|-----------------------------------------------------------------------------------------------------------------------------------------------------------------------------------------------------------------------------------------------------------------------------------------------------------------------------------------------------------------------------------------------------------------------------------------------------------------------------------------------------------------------------------------------------------------|
| Disease Module       | Molecular pathway in which gene expression profiles are significant associated with the disease phenotype. Modules are described based on the current KEGG (Kyoto Encyclopedia of Genes and Genomes) annotation of molecular pathways.                                                                                                                                                                                                                                                                                                                          |
| Intraspecies Network | Gene network in which structural relationships among genes are based on the training with data from a single organism.                                                                                                                                                                                                                                                                                                                                                                                                                                          |
| Interspecies Network | Gene regulatory network of which the structure holds a consensus across all species.                                                                                                                                                                                                                                                                                                                                                                                                                                                                            |
| Sum Squared Error    | The SSE measurement is the sum of the squares of the deviations between the measured expression values (or assigned disease phenotype) and the values predicted from the response variable which can be the class node (discrete variable), gene or gene transcript node (continuous variable). The identifier for the graph node is represented by $g$ and the case id is represented by $i$ .                                                                                                                                                                 |
|                      | $SSE_g = \sum_{i=1}^n (\text{measured value}_{g,i} - \text{predicted value}_{g,i})^2$                                                                                                                                                                                                                                                                                                                                                                                                                                                                           |
| Sensitivity          | The probability of accurate prediction of cases with the disease-associated phenotype.<br>$\text{Sensitivity} = \frac{\text{number of True case}^{\text{disease}}}{\text{total number of case}^{\text{disease}}}$                                                                                                                                                                                                                                                                                                                                               |
| Specificity          | The probability of accurate prediction of control cases without the disease-associated phenotype.<br>$\text{Specificity} = \frac{\text{number of True case}^{\text{control}}}{\text{total number of case}^{\text{control}}}$                                                                                                                                                                                                                                                                                                                                    |
| Confidence Score     | The ratio of the number of times a link is found in a network structure to the maximum number of times the link can be found.<br>1. For the training set (species A):<br>$\text{Confidence Score} = \frac{\text{number of times a link is found } (n^{\text{species A}})}{\text{total number of constructed networks on A}}$<br>2. For the independent test set (species B):<br>$\text{Confidence Score} = \frac{\text{number of times a link is found } (n^{\text{species B}})}{n^{\text{species A}} \times \text{total number of constructed networks on B}}$ |
| Robustness           | The number of relationships found for genes from the disease module compared to those from random genes after applying different confidence thresholds.                                                                                                                                                                                                                                                                                                                                                                                                         |
| Translatability      | The likelihood of finding genes neighboring relatives that are selected as part of the intraspecies network structure during the phase of independent testing in the other species.                                                                                                                                                                                                                                                                                                                                                                             |
| Naïve Dandelion      | A class of Dandelion algorithm in which the networks are constructed on datasets derived from different organisms, where transcript expression levels for the same gene are averaged.                                                                                                                                                                                                                                                                                                                                                                           |
| Exhaustive Dandelion | A class of Dandelion algorithm in which the structure of intraspecies networks are learnt on gene transcript level. This procedure involves a model-driven selection of the most probable homologous transcript isoform which is best translated across species.                                                                                                                                                                                                                                                                                                |
| Disease Domain       | A sub-network structure associated with the class (disease) node which is defined based on the Markov blanket principle for the extension of the class node connectivity. This sub structure is composed of class node, its children, and its children's other parents that share the same level of confidence ( $\geq 0.1$ ). A Markov blanket of the class node is the only knowledge needed to predict the disease phenotype.                                                                                                                                |

**Protocol S1** – Algorithm for Simulated Annealing Structure Learning.

**Input:**  $t_0 = 10$ ,  $maxfc = 1000$ ,  $D$ ,  $mode$ ,  $netmap$   
 $fc = 0$ ,  $t = t_0$ ,  $t_n = 0.001$   
 $c = (t_n/t_0)^{1/maxfc}$   
**Initial**  $bn$  to a Bayesian classifier with no inter-gene links  
 $result = bn$   
 $oldscore = score(bn)$   
**While**  $fc < maxfc$  **do**

```

For each operator do
  If mode = 'train'
    Apply operator to bn
  Else if mode = 'test'
    Apply operator to bn based on links available in networkMap
  End if
  newscore = score(bn)
  fc = fc + 1
  dscore = newscore – oldscore
  If newscore > oldscore then
    result = bn
  Else if  $r(0,1) < e^{\frac{dscore}{t}}$  then
    Undo the operator
  End if
End for
t = t × c
End while
Output: result

```

## Protocol S2 – Dandelion algorithm of interspecies construction of disease network

```

Input: Speciestrain, {Speciestest 1, ..., Speciestest M}, trainfold, {testfold 1, ..., testfold M}, exhaustiveT/F
For k = 1 to trainfold
  Learn intraspeciesTranscriptbn using Algorithm 1 on training folds of Speciestrain
  Score Speciestrain {NodesSSE, NodesSTD, LinksConfidence}
  If exhaustive = true
    Transform intraspeciesTranscriptbn to intraspeciesGenebn
  End if
  Assess Disease Connection
  If intraspeciesGenebn is not connected to disease node then
    Drop intraspeciesGenebn
  Else
    Translate intraspeciesGenebn to networkMap
    For i = 1 to M
      Optimize and Test networkMap in Speciestest i using Algorithm 1
      Score Speciestest i {NodesSSE, NodesSTD, LinksConfidence}
    End for
  End if
End for
Integrate intraspeciesGenebn using LinksConfidence threshold of 0.1
Output: interspeciesbn

```

Table S2 - Gene lists for independent tests and performance assessments.

| Proteasome and 30 Random Genes |           |                  |           | 70 Random Genes (not deregulated) |           | Ribosome |            |
|--------------------------------|-----------|------------------|-----------|-----------------------------------|-----------|----------|------------|
| Genes                          |           | 100 Random Genes |           |                                   |           |          |            |
| PSMD3                          | LOC643791 | LOC644993        | LOC651979 | CPSF4L                            | WTAP      | FAU      | RPS6       |
| PSMD12                         | C9orf79   | LOC147710        | OR4A47    | LOC652683                         | CRTC2     | RPSA     | RPS7       |
| PSMD11                         | MGRN1     | PCDHB5           | KCTD14    | MME                               | LSM14B    | RPL10A   | RPS9       |
| PSMD6                          | LOC653587 | KIAA1688         | CDK5RAP2  | LOC653261                         | PRKG2     | RPL3     | RPS10      |
| PSMD7                          | CNGA4     | A4GALT           | TMPRSS4   | CD200R1                           | LUM       | RPL3L    | RPS11      |
| PSMD13                         | OTOR      | SFN              | ADAMTS13  | HSD11B1                           | PRUNE     | RPL4     | RPS12      |
| PSMD14                         | GPR89A    | BCL10            | FRAS1     | PDE4DIP                           | RPS3AP47  | RPL5     | RPS13      |
| PSMD8                          | GPR89B    | MSX2             | SCUBE1    | EEDP1                             | P2RX2     | RPL6     | RPS14      |
| SHFM1                          | HAPLN4    | SNRPB            | LOC642855 | KRTAP4-11                         | NAV1      | RPL7     | RPS15      |
| PSMD4                          | LOC641994 | HERC3            | LOC442261 | SLFN14                            | XRCC2     | RPL7A    | RPS15A     |
| PSMD2                          | THBS2     | HRASLS2          | ZNF100    | POU4F1                            | C17orf87  | RPL8     | RPS16      |
| PSMD1                          | ZNF768    | DLD              | HDGFRP3   | LOC442132                         | CACNA1I   | RPL9     | RPS17      |
| PSMC2                          | KIAA1147  | LOC649217        | LOC642453 | ST6GLA2                           | ELSPBP1   | RPL11    | RPS18      |
| PSMC1                          | C19orf59  | IGHG1            | RHBDD1    | ACTR3B                            | EPGN      | RPL12    | RPS19      |
| LOC643668                      | BARHL2    | GNPTAB           | RSL1D1    | PEF1                              | LOC650933 | RPL13    | RPS20      |
| PSMC5                          | LOC400831 | NOC4L            | LOC652610 | OGG1                              | HDX       | RPL15    | RPS21      |
| PSMC6                          | HMGNA4    | PLD3             | LOC646699 | TAF9B                             | APOL3     | RPL17    | RPS23      |
| PSMC3                          | TSSK4     | LOC648974        | KNDC1     | LOC653421                         | CNOT4     | RPL18    | RPS24      |
| PSMC4                          | RTKN2     | GTPBP8           | DACT3     | LOC441347                         | PFAS      | RPL18A   | RPS25      |
| PSMA6                          | RXRA      | LIF              | FLJ16369  | FRMPD2                            | MAP3K14   | RPL19    | RPS26      |
| PSMA2                          | MYL5      | LOC440104        | VIPR1     | HSCB                              |           | RPL21    | RPS27      |
| PSMA4                          | UBTD1     | WAC              | COPS8     | CHD1                              |           | RPL22    | RPS27A     |
| PSMA8                          | OR1J4     | KALRN            | NIF3L1    | LOC645781                         |           | RPL23A   | RPS28      |
| PSMA7                          | TRAPPC5   | UNC93A           | PPAP2C    | LOC729446                         |           | RPL24    | RPS29      |
| PSMA5                          | ADAM20    | IFNAR1           | LOC644431 | FAM129C                           |           | RPL26    | UBA52      |
| PSMA1                          |           | NMT1             | TCTE3     | FAM90A15                          |           | RPL27    | RPL14      |
| PSMA3                          |           | LOC652750        | TTF2      | C1orf187                          |           | RPL30    | RPL23      |
| PSMB6                          |           | LOC653707        | RPS7      | HIPK2                             |           | RPL27A   | RPL35      |
| PSMB7                          |           | SLC26A9          | ITGA8     | XKR3                              |           | RPL28    | RPL13A     |
| PSMB3                          |           | ETFDH            | CCAR1     | RAB2A                             |           | RPL29    | RPL36      |
| PSMB2                          |           | ADAM23           | PDCD10    | FOXR1                             |           | RPL31    | MRPL13     |
| PSMB5                          |           | FBXO9            | LOC651400 | CD72                              |           | RPL32    | RPS27L     |
| PSMB1                          |           | LOC643089        | CDC42BPG  | TRAF4                             |           | RPL34    | RPL26L1    |
| PSMB4                          |           | ATP5D            | SP2       | NCAN                              |           | RPL35A   | C15orf15   |
| PSME1                          |           | CST6             | LOC649432 | HRC                               |           | RPL36AL  | RPL10L     |
| PSME2                          |           | RPL11            | LOC732093 | LOC643577                         |           | RPL37    | RPL22L1    |
| PSME3                          |           | FAM47B           | TMEM165   | AKR7A2P1                          |           | RPL37A   | RSL24D1P11 |
| PSME4                          |           | LHFPL4           | LHCGR     | PLK2                              |           | RPL38    |            |
| POMP                           |           | MGC42105         | SPAG7     | RABL2B                            |           | RPL39    |            |
| PSMF1                          |           | STOX2            | INOC1     | CLGN                              |           | RPL41    |            |
| IFNG                           |           | FRMD5            | OR2T10    | LRRRC49                           |           | RPL36A   |            |
| PSMB9                          |           | CHL1             | DEPDC5    | CHORDC1                           |           | RPLP0    |            |
| PSMB10                         |           | UNQ830           | ADAD1     | KRT18P51                          |           | RPLP1    |            |
| PSMB8                          |           | STCH             | LOC339529 | OR13G1                            |           | RPLP2    |            |
| PSMB11                         |           | B4GALNT3         | FZD9      | CCL21                             |           | RPS2     |            |
| AKR1CL1                        |           | SUMO2            | CD46      | LRFN2                             |           | RPS3     |            |
| CHRNA5                         |           | C20orf30         | JARID1B   | SLC35A5                           |           | RPS3A    |            |
| UNC13B                         |           | CNIH3            | DUX4      | RDH12                             |           | RPS4X    |            |
| DES                            |           | DBX2             | DPPA4     | FAM154B                           |           | RPS4Y1   |            |
| STT3A                          |           | GSTM5P1          | YSK4      | LOC388948                         |           | RPS5     |            |

**Table S3** – The list of primers that were used for qPCR validation study in IM2 cell model of OPMD.

| Gene          | FW Primer Sequence   | RV Primer Sequence        |
|---------------|----------------------|---------------------------|
| RPN11 (Psm14) | CACCTGAACAGCTGGCAATA | GAGCATTGGGAACGAAGAAG      |
| RPN15 (Shfm1) | AGCACGGCTACAAGATGGAG | TGAACCAAAAAGATTAATCAAAACA |
| RPT3 (Psmc4)  | ACCTCAGACCAGAAGCCAGA | CACCACACGGATAAATGCAG      |
| β2 (Psmb7)    | GCACTACCCTGTCTCACC   | AGGGGTGGTATGCACCCCGAG     |
| β5 (Psmb5)    | CGGTCGCAGCAGCCTCCAAA | GCATACACGGAGCCAGAGCCC     |
| PA28α (Psm1)  | AAGCCAAGGTGGATGTGTTC | GGGTACTGGGATGTCCAATG      |
| PA28β (Psm2)  | CCTGGAGAGTGAAAGCGAAA | GTCATCAGCCTCCTGGAAAA      |
| β2i (Psm10)   | ATTTGCTCCTGGAACACAC  | CCACTTCATTCCACCTCCAT      |
| ACTA1 (Acta1) | CGAGGTATCTGACCCTGAA  | AGGTGTGGTGCCAGATCTTC      |
| mHPRT         | CGTCGTGATTAGCGATGATG | TTTTCAAATCCTCGGCATA       |

**Table S4** – Correlation between the expression profiles of genes selected from the interspecies disease domains.

| Gene A | Gene B | Train Set  | Interspecies Confidence | Human             |          | Mouse             |          | Drosophila        |          |
|--------|--------|------------|-------------------------|-------------------|----------|-------------------|----------|-------------------|----------|
|        |        |            |                         | Correlation Score | P-value  | Correlation Score | P-value  | Correlation Score | P-value  |
| PA28α  | RPN1   | Human      | Strong                  | 0.6059            | 2.80E-03 | 0.8650            | 8.50E-11 | -0.3762           | 2.37E-02 |
| PA28α  | RPN15  | Human      | Strong                  | -0.0466           | 8.37E-01 | 0.7521            | 4.50E-07 | 0.4801            | 3.03E-03 |
| PA28α  | RPN8   | Mouse      | Strong                  | -0.0670           | 7.57E-01 | 0.9245            | 1.58E-14 | 0.4658            | 4.20E-03 |
| PA28α  | RPT3   | Mouse      | Strong                  | 0.5984            | 3.26E-03 | 0.7944            | 3.42E-08 | 0.4491            | 6.00E-03 |
| PA28α  | α3     | Human      | Strong                  | -0.5234           | 1.24E-02 | 0.8988            | 1.24E-12 | 0.5498            | 5.14E-04 |
| RPN10  | RPN3   | Mouse      | Moderate                | 0.5450            | 8.72E-03 | 0.6400            | 6.07E-05 | 0.5503            | 5.06E-04 |
| RPN10  | RPN6   | Mouse      | Moderate                | 0.6300            | 1.68E-03 | 0.8634            | 1.00E-10 | 0.8180            | 1.12E-09 |
| RPN10  | RPN9   | Mouse      | Strong                  | 0.3338            | 1.29E-01 | 0.8760            | 2.46E-11 | 0.8545            | 3.36E-11 |
| β3     | RPN12  | Mouse      | Moderate                | 0.4635            | 2.98E-02 | 0.8653            | 8.15E-11 | 0.5090            | 1.52E-03 |
| β3     | RPN7   | Mouse      | Moderate                | -0.2445           | 2.73E-01 | 0.9386            | 7.17E-16 | 0.6361            | 3.05E-05 |
| β3     | RPT3   | Drosophila | Strong                  | 0.4274            | 4.72E-02 | 0.8652            | 8.32E-11 | 0.5855            | 1.76E-04 |
| β3     | α3     | Mouse      | Moderate                | 0.0910            | 6.87E-01 | 0.9456            | 1.15E-16 | 0.8367            | 2.07E-10 |
| β3     | α4     | Drosophila | Strong                  | 0.2359            | 2.91E-01 | 0.9378            | 8.65E-16 | 0.7959            | 6.56E-09 |
| β5i    | α6     | Mouse      | Strong                  | -0.5980           | 3.28E-03 | 0.6593            | 3.01E-05 | 0.6393            | 2.70E-05 |
| β5i    | β1i    | Mouse      | Moderate                | 0.6729            | 6.00E-04 | 0.9053            | 4.63E-13 | -0.1952           | 2.54E-01 |
| β5i    | β4     | Mouse      | Strong                  | 0.1983            | 3.76E-01 | 0.7679            | 1.83E-07 | 0.6416            | 2.48E-05 |
